# Supplementary material for: Nesfatin-1 enhances vascular smooth muscle calcification through facilitating BMP-2 osteogenic signaling
Source: PubMed Central journal article supplement — Cell Commun Signal. 2024 Oct 11;22:488. doi: 10.1186/s12964-024-01873-7 (PMC11468037; doi:10.1186/s12964-024-01873-7), 2024-10-11

Figure 1A-Nesfatin-1

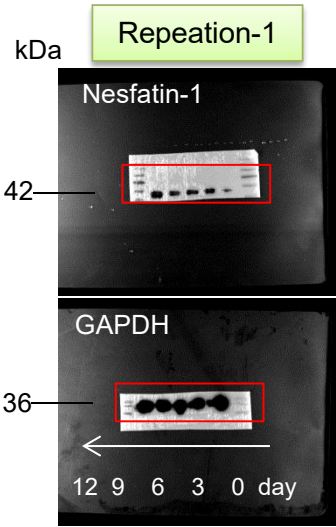

Figure 1D-Nesfatin-1

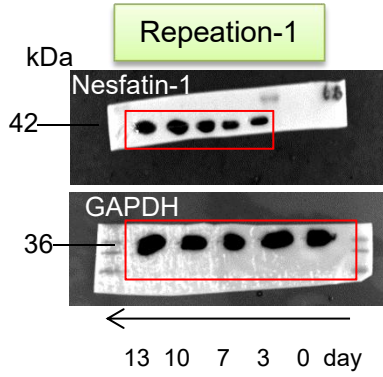

Figure 1G-Nesfatin-1

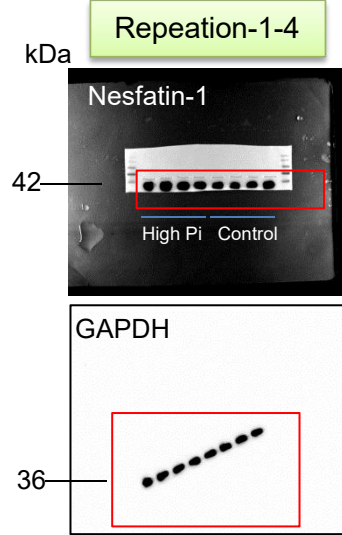

Figure 1J-Nesfatin-1

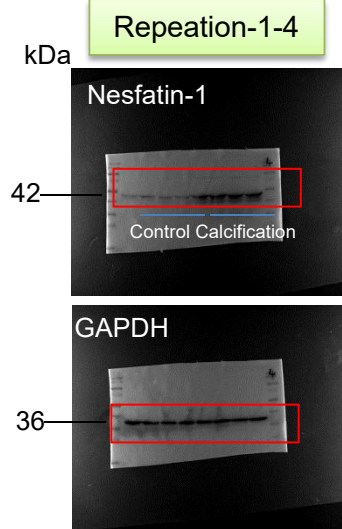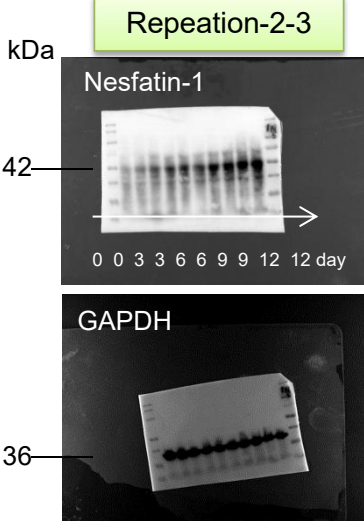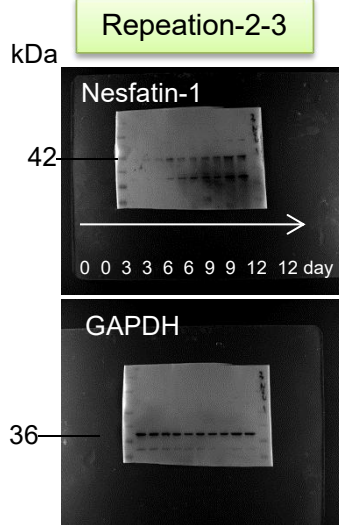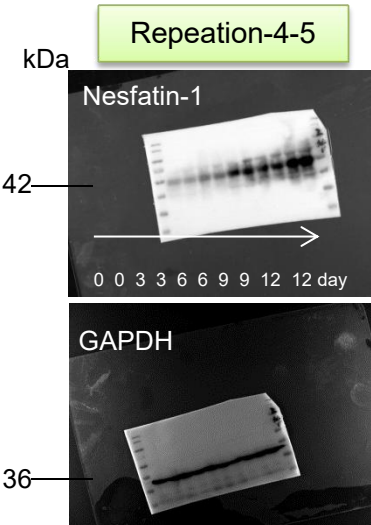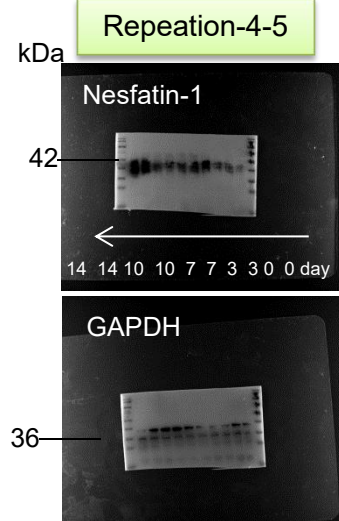

Figure 2A-Nesfatin-1

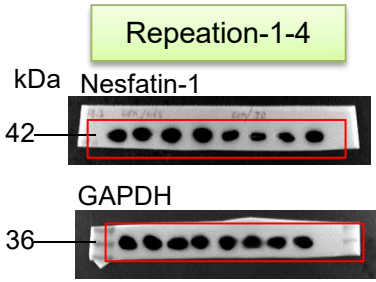

Figure 3A-Nesfatin-1

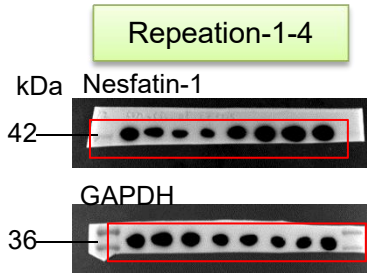

Figure 4B-P-Smad

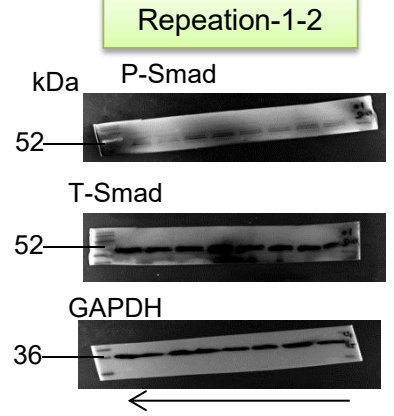

Figure 2H-RUNX2

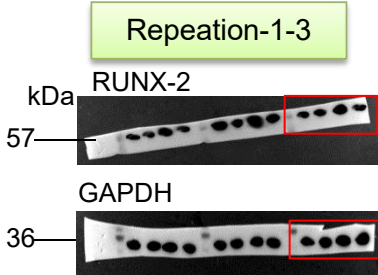

Figure 3H-RUNX2

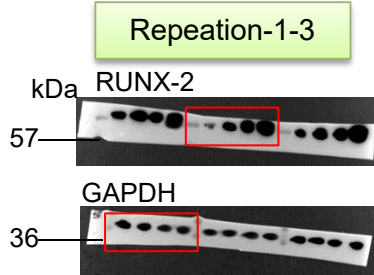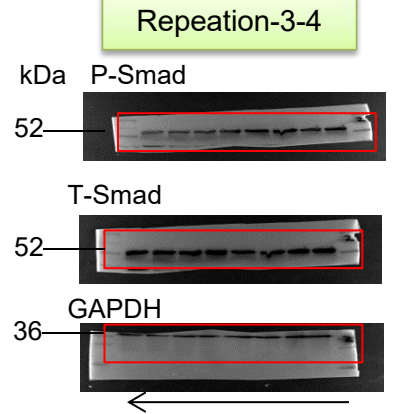

Figure 2H-BMP-2

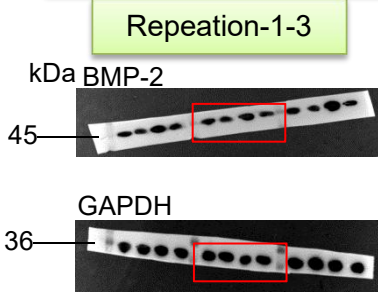

Figure 3H-BMP-2

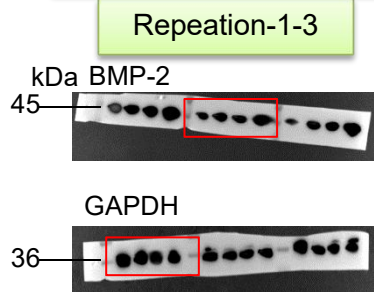

Figure 4B-RUNX2

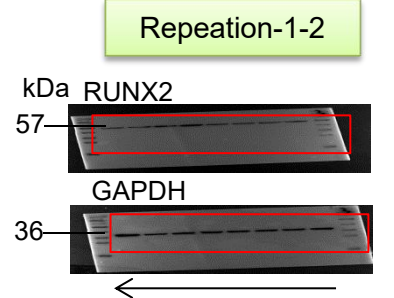

Figure 2H-α-SMA

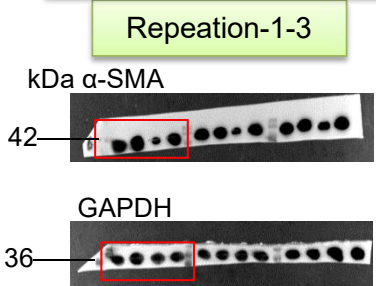

Figure 3H-α-SMA

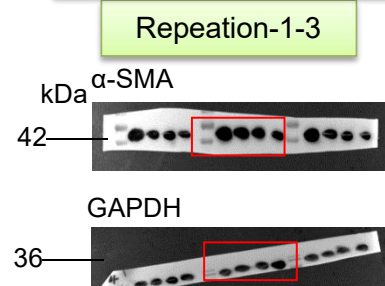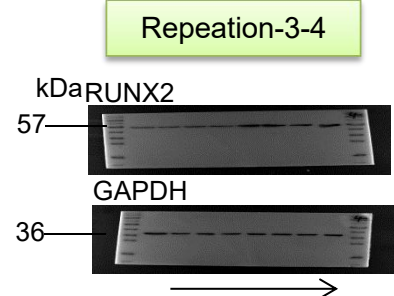

Figure 2H-SM22α

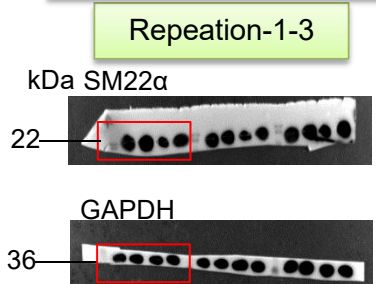

Figure 3H-SM22α

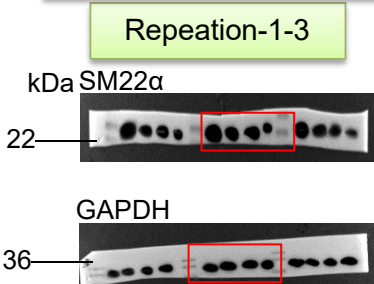

Figure 4B-MSX2

Repeation-1-2

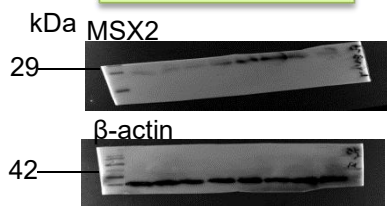

Repeation-3-4

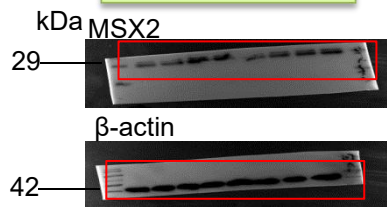

Figure 4E-Ac-RUNX2

Repeation-1-2

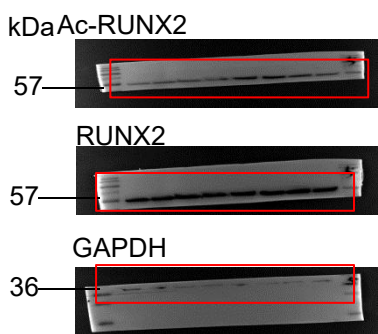

Repeation-3-4

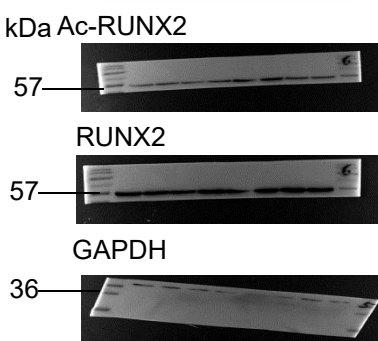

Figure 4F-Cytoplasm-RUNX2

Repeation-1-2

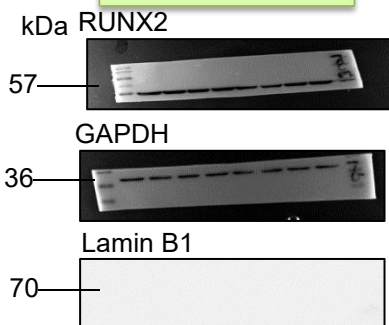

Repeation-3-4

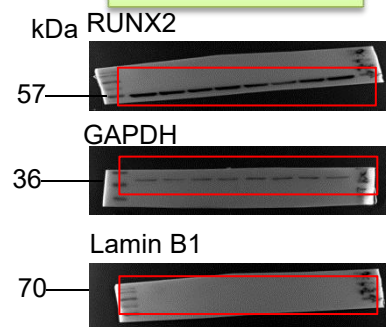

Figure 4F-Nuclear-RUNX2

Repeation-1-2

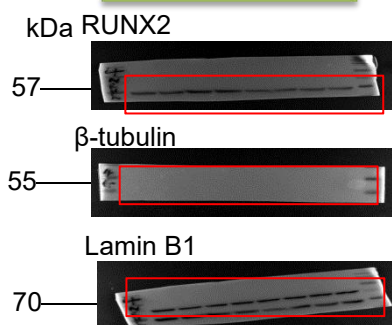

Repeation-3-4

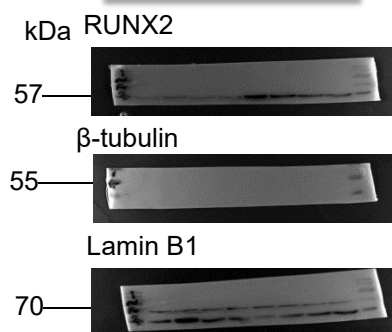

Figure 4H-P-HDAC4

Repeation-1-2

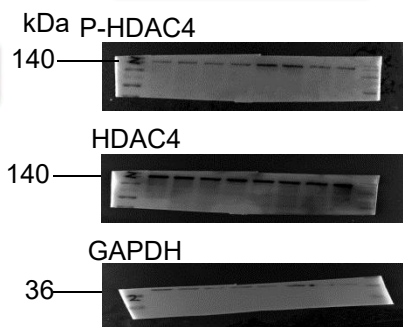

Repeation-3-4

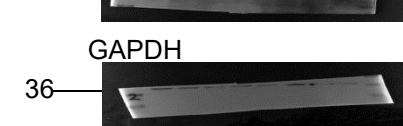

Repeation-3-4

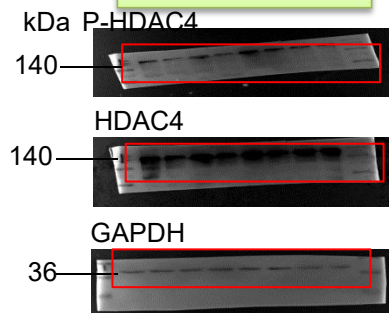

Figure 4I-Cytoplasm-HDAC4

Repeation-1-2

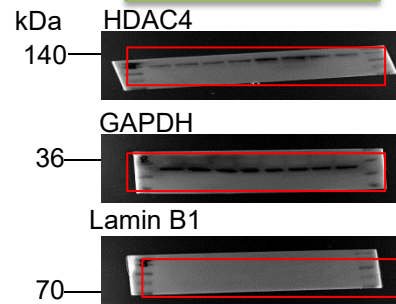

Repeation-3-4

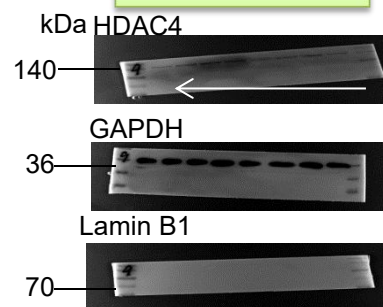

Figure 4I-Nuclear-HDAC4

Repeation-1-2

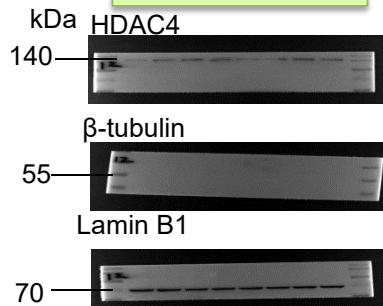

Repeation-3-4

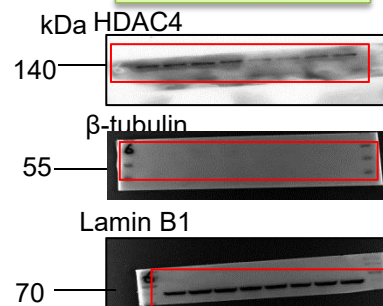

Figure 5A-BMP-2

Repeation-1-2

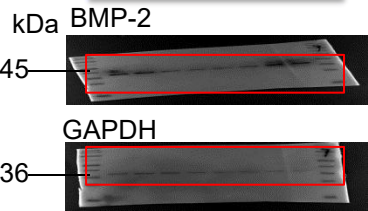

Repeation-3-4

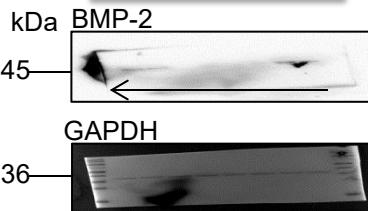

Figure 5B-BMP-2

Repeation-1-2

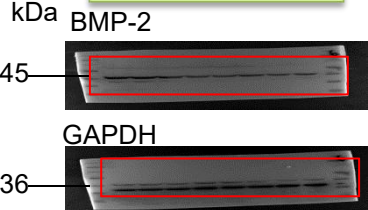

Repeation-3-4

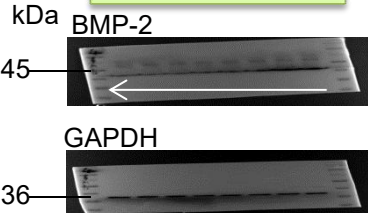

Figure 5C-BMP-2

CHX+Con shRNA

Repeation-1-2

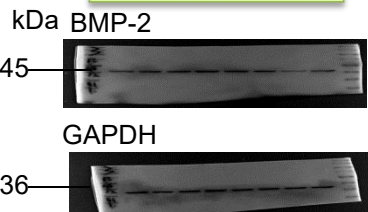

Repeation-3-4

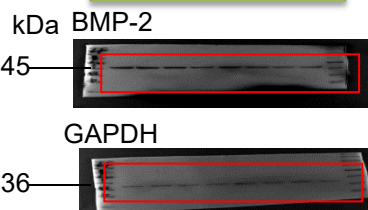

Figure 5C-BMP-2

CHX+Nesfatin-1 shRNA

Repeation-1-2

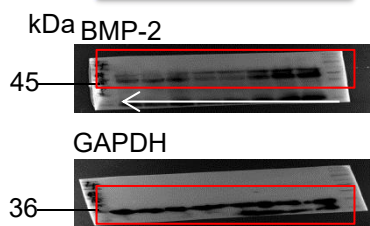

Repeation-3-4

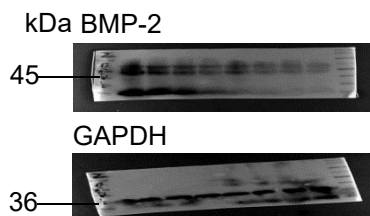

Figure 5D-BMP-2

Repeation-1-4

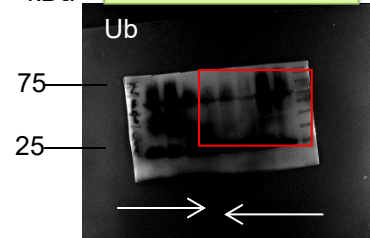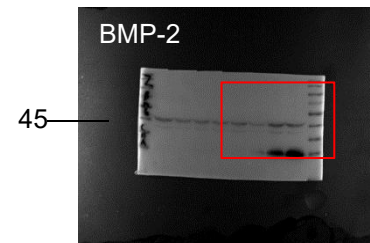

Figure 5E-BMP-2

Repeation-1-4

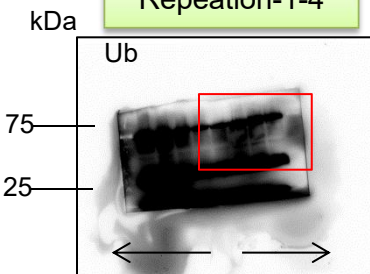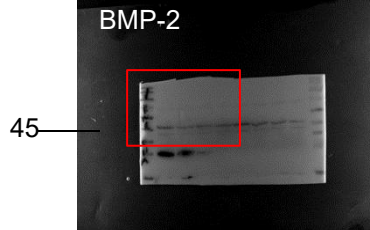

Figure 5F

Repeation-1

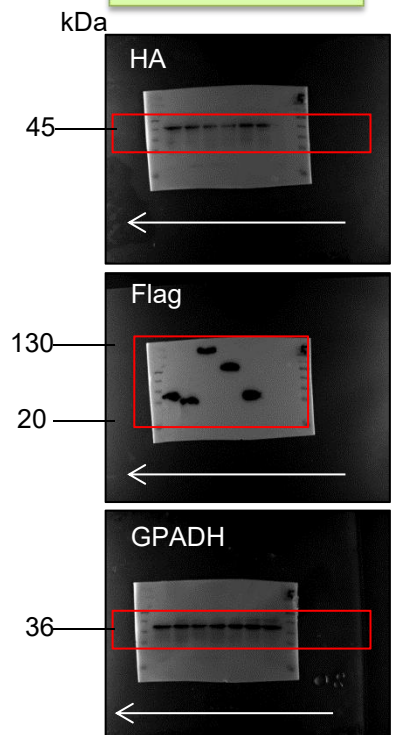

Repeation-2

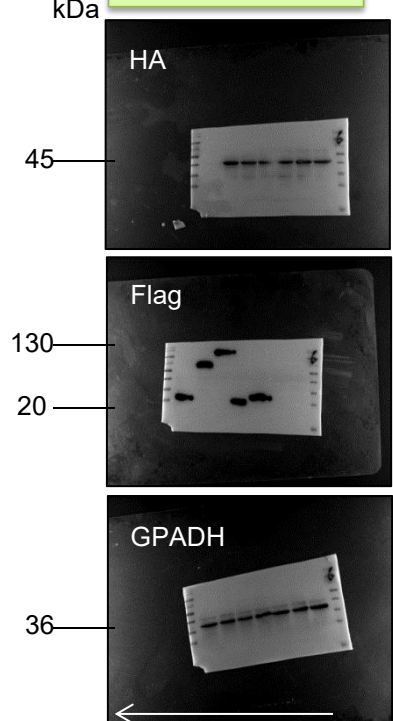

Figure 5F

Repeation-3

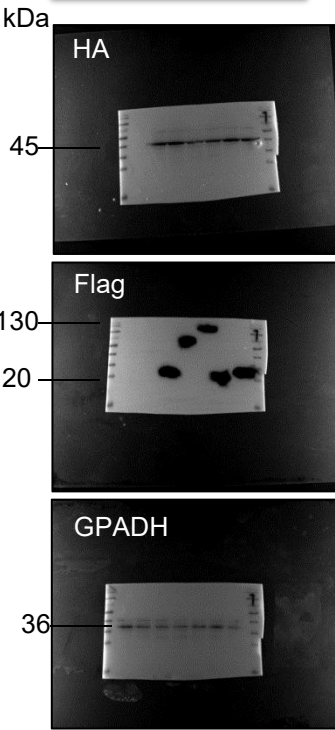

Repeation-4

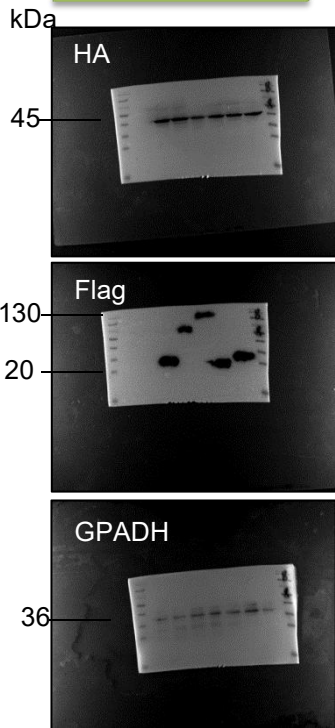

Figure 5G

Repeation-1-3

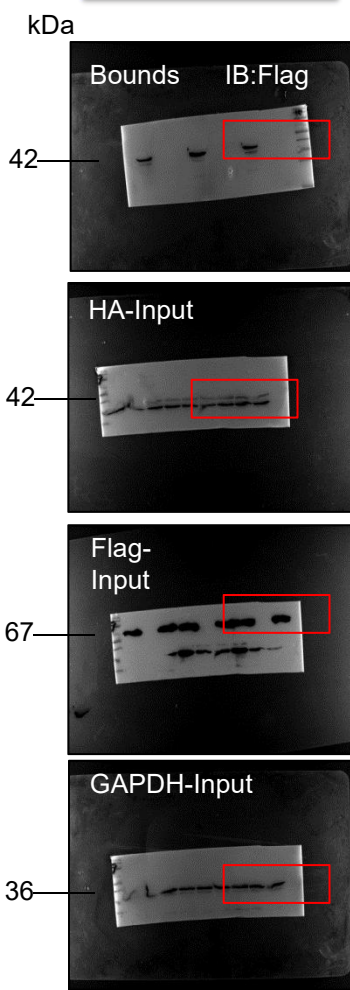

Figure 5H

Repeation-1-2

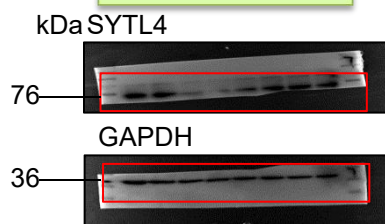

Repeation-3-4

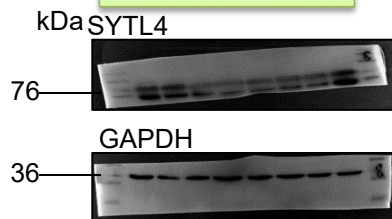

Figure 5H

Repeation-1-2

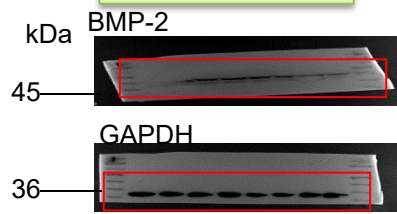

Repeation-3-4

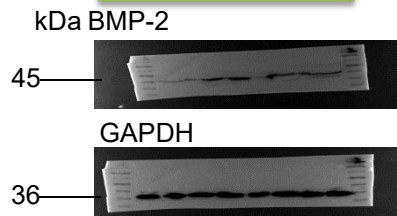

Figure 6A

Repeation-1-2

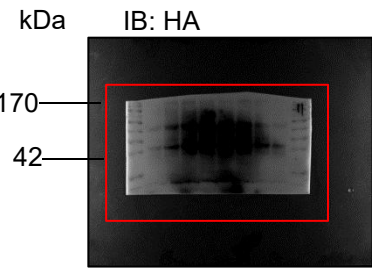

His

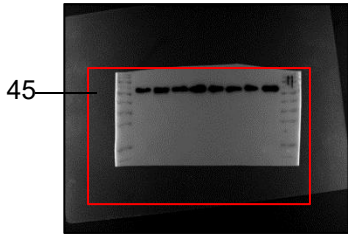

Repeation-3-4

IB: HA

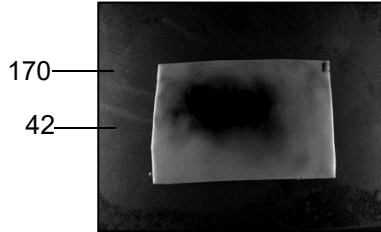

His

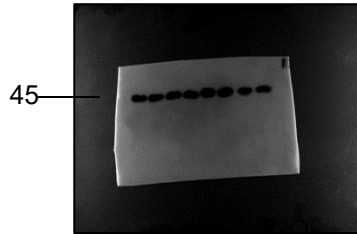

Figure 6B

Repeation-1-2

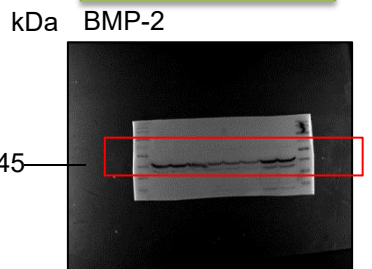

GAPDH

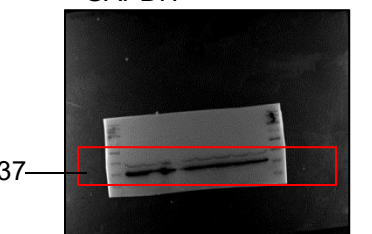

Figure 6B

Repeation-3-4

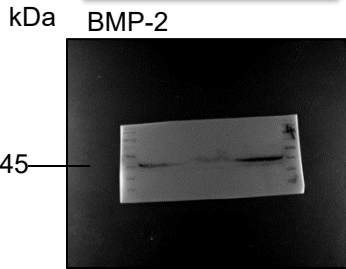

GAPDH

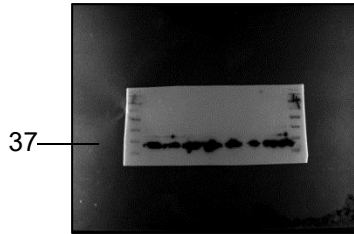

Figure 6E

Repeation-1-3

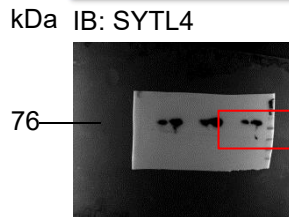

IB: Nesfatin-1

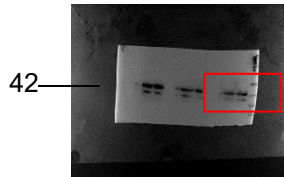

Input: SYTL4

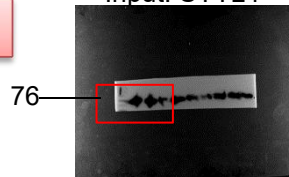

Input: Nesfatin-1

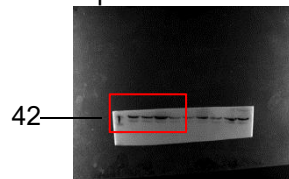

Input: GAPDH

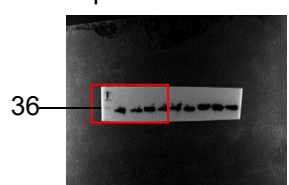

Figure 6F

Repeation-1-3

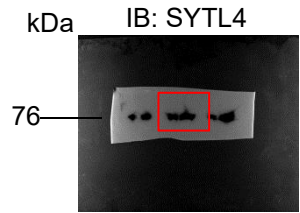

IB: BMP-2

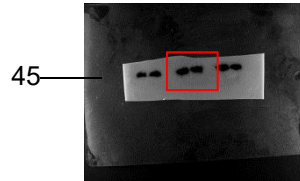

Input: BMP-2

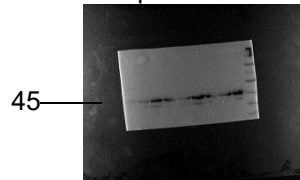

Input: SYTL4

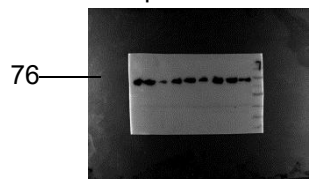

Input: GAPDH

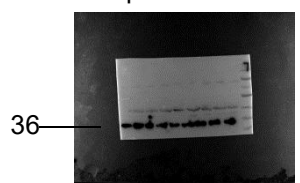

Figure 7H-Nesfatin-1

Repeation-1-2

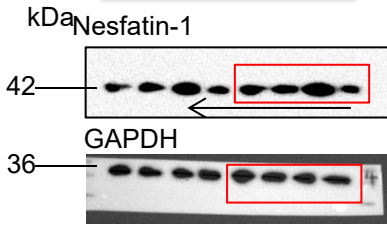

Repeation-3-4

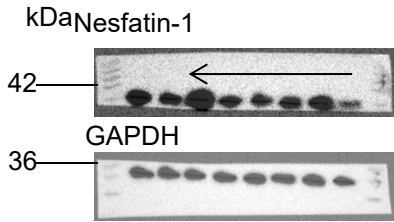

Figure 7H-RUNX2

Repeation-1-3

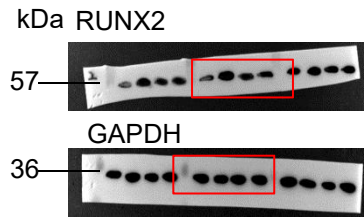

Figure 7H-BMP-2

Repeation-1-3

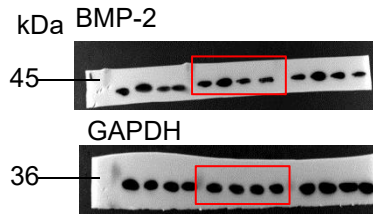

Figure 7H- $\alpha$ -SMA

Repeation-1-3

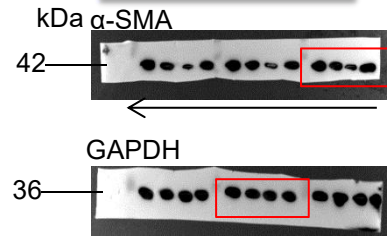

Figure 7H-SM22 $\alpha$

Repeation-1-3

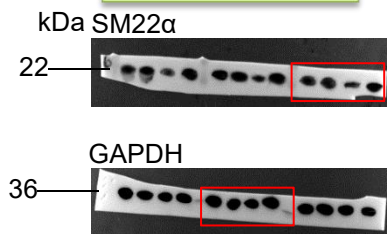

Figure 8D-STAT3

Repeation-1-4

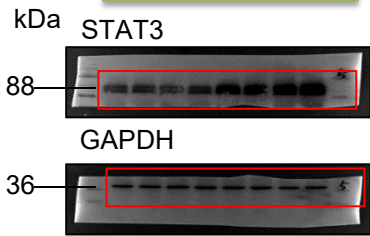

Figure 8D-Nesfatin-1

Repeation-1-4

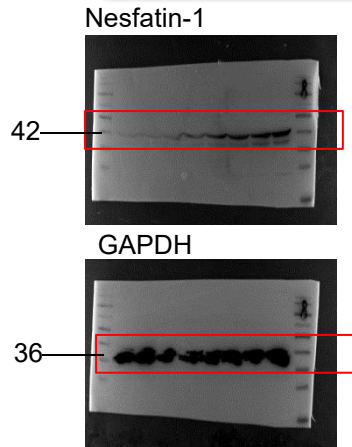

Figure 8D-RUNX2

Repeation-1-4

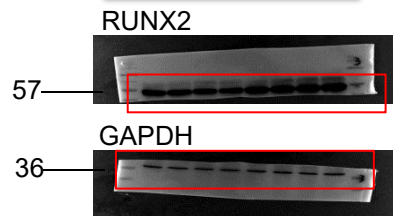

Figure 8D-BMP-2

Repeation-1-4

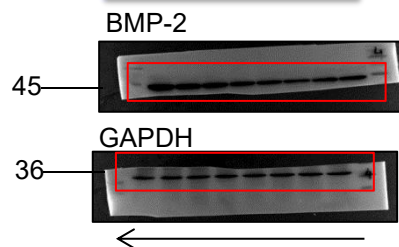

Figure 8E-STAT3

Repeation-1-4

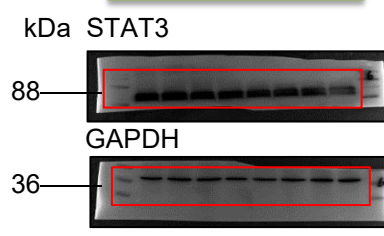

Figure 8E-Nesfatin-1

Repeation-1-4

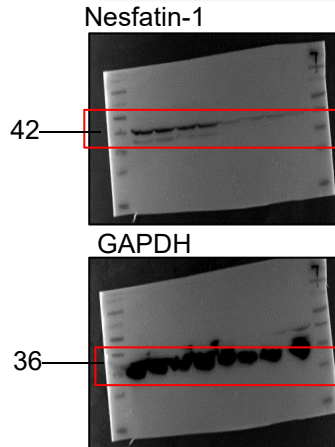

Figure 8E-RUNX2

Repeation-1-4

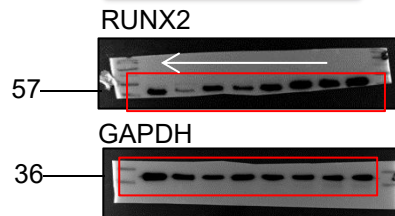

Figure 8E-BMP-2

Repeation-1-4

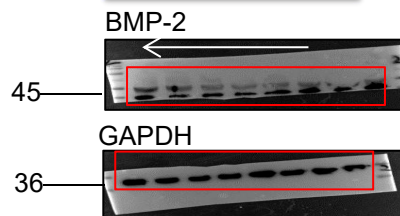



Figure S2A-Nesfatin-1

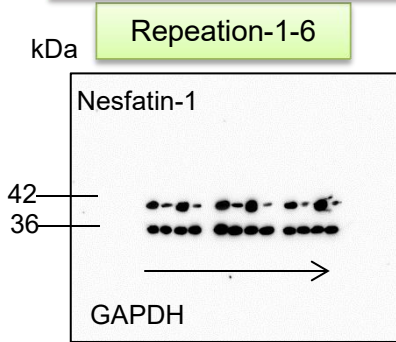

Figure S2H-Nesfatin-1

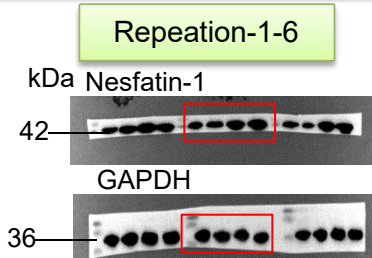

Figure S3A-Nesfatin-1

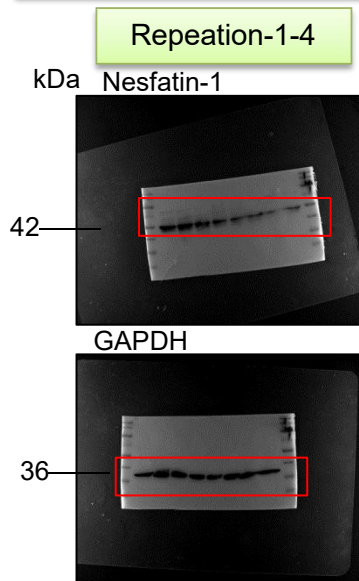

Figure S3C-Nesfatin-1

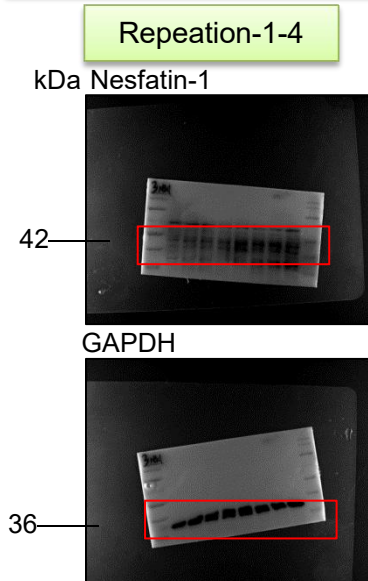

Figure S3D-RUNX2

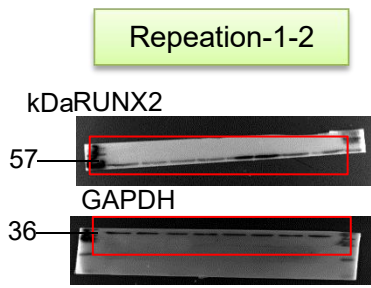

Repeation-3-4

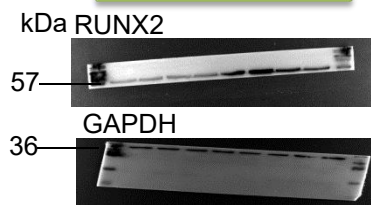

Figure S3D-BMP-2

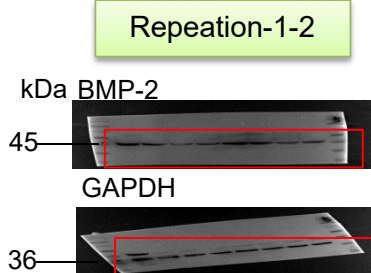

Repeation-3-4

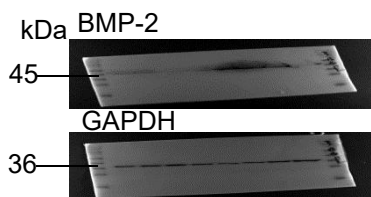

Figure S3D-α-SMA

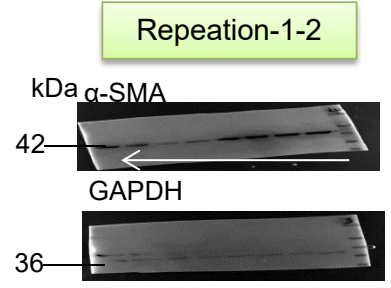

Repeation-3-4

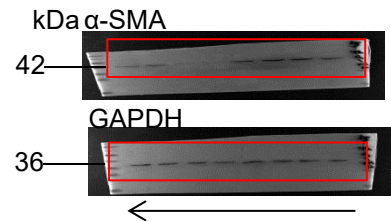

Figure S3D-SM22α

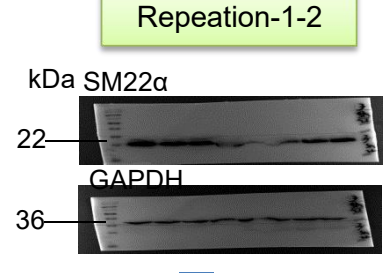

Repeation-3-4

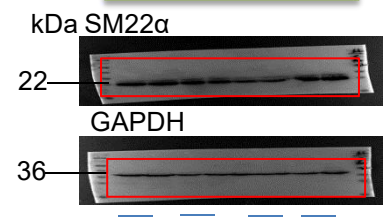

Figure S4D-RUNX2

Repeation-1-2

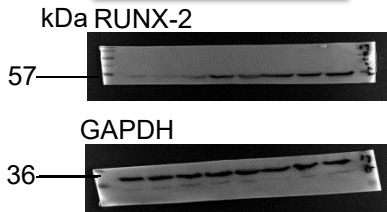

Repeation-3-4

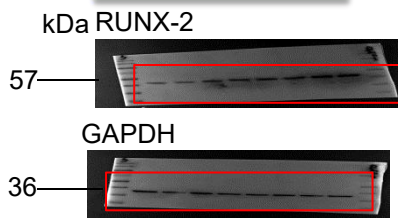

Figure S4D-BMP-2

Repeation-1-2

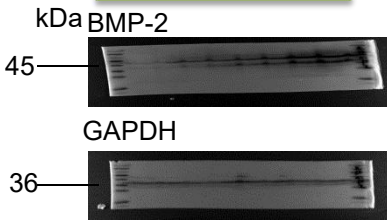

Repeation-3-4

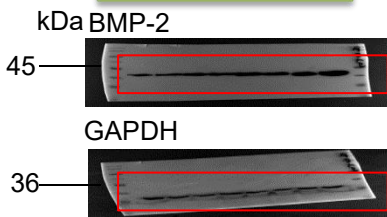

Figure S4D- $\alpha$ -SMA

Repeation-1-2

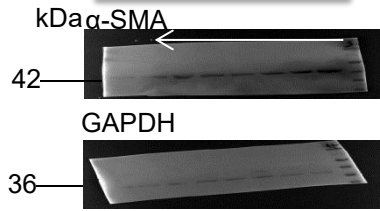

Repeation-1-2

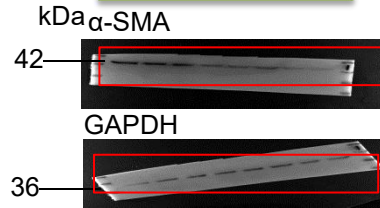

Figure S4D-SM22 $\alpha$

Repeation-1-2

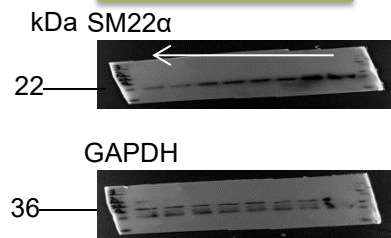

Repeation-3-4

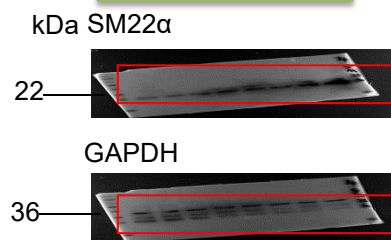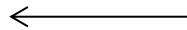

Figure S7B

Repeation-1-4

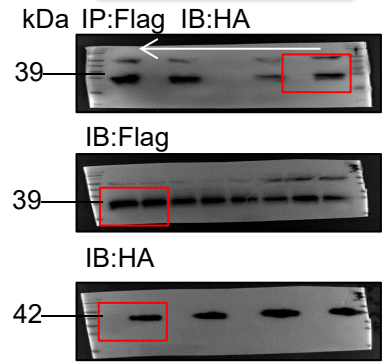

Figure S7C

Repeation-1-4

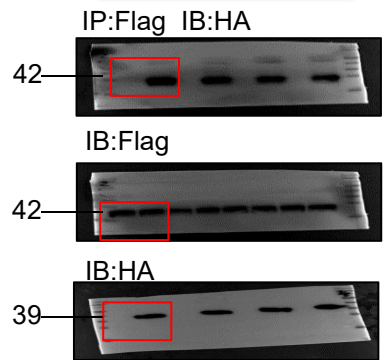

Figure S7D

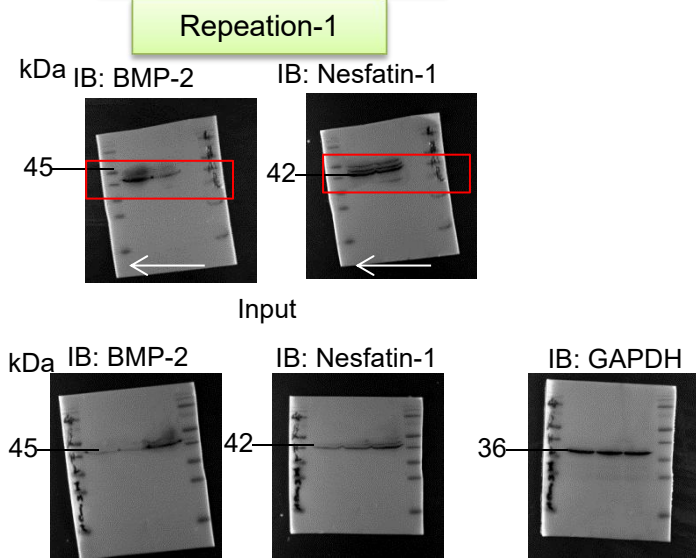

Repeation-2-4

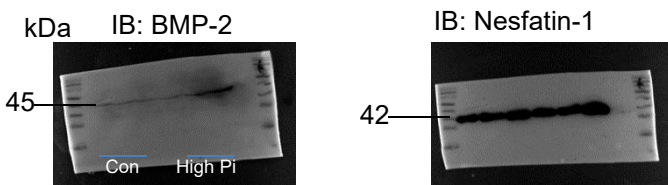

Repeation-5-7

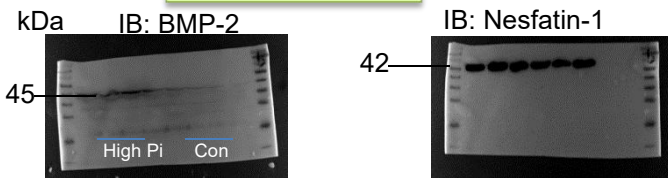

Figure S7E

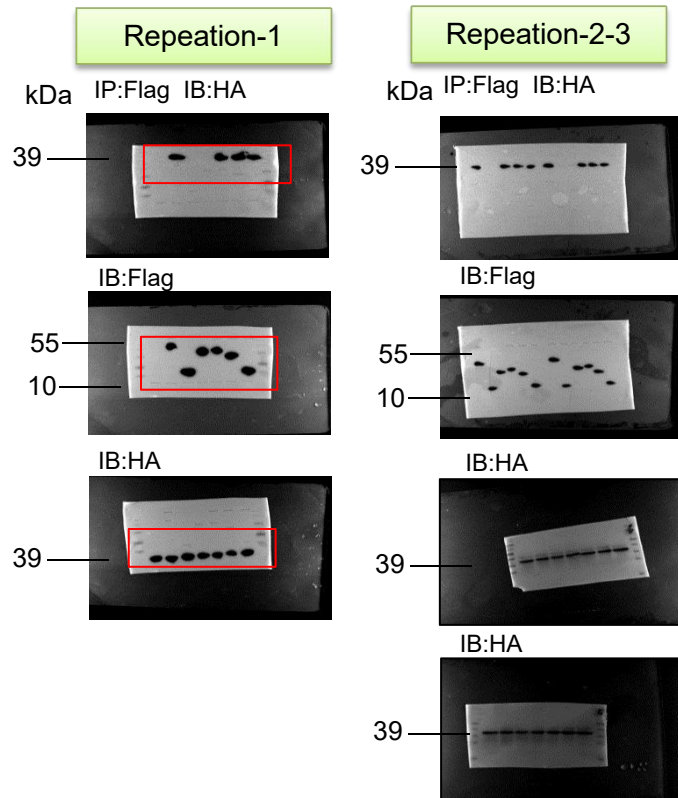

Figure S7F

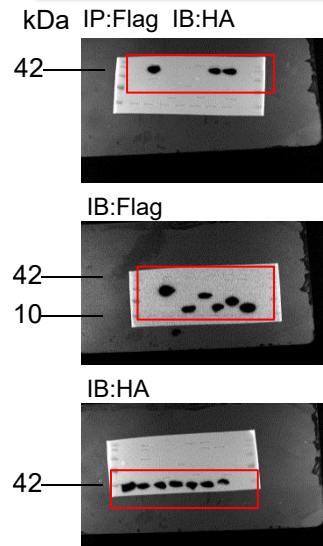

Figure S8A-IP

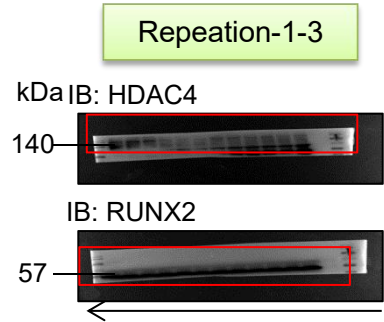

Figure S8A-Input

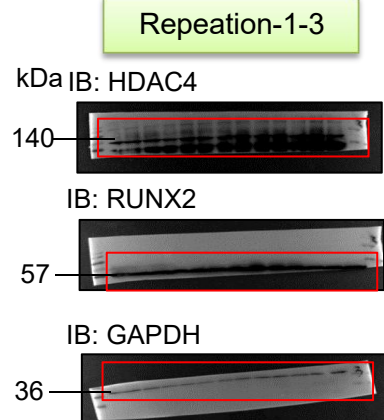

Figure S9A-P-Smad

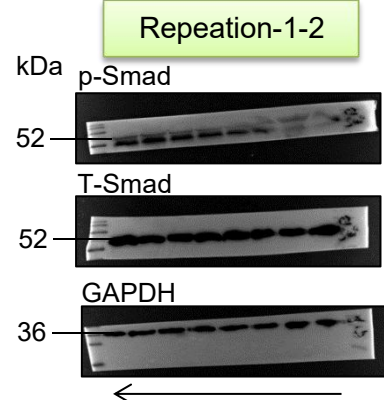

Figure S9A-P-Smad

Repeation-3-4

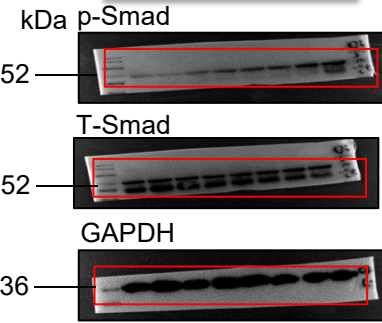

Figure S9A-RUNX2

Repeation-1-2

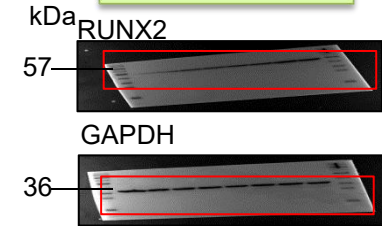

Repeation-3-4

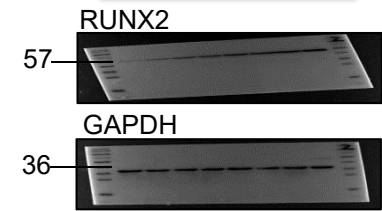

Figure S9A-MSX2

Repeation-1-2

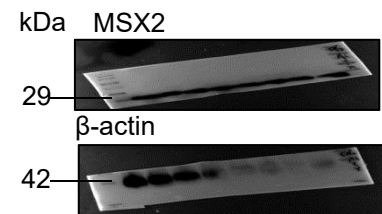

Repeation-3-4

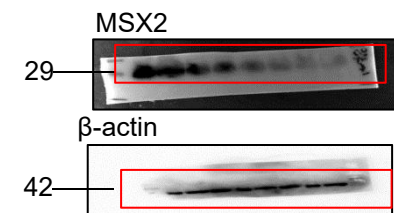

Figure S9D-Ac-RUNX2

Repeation-1-2

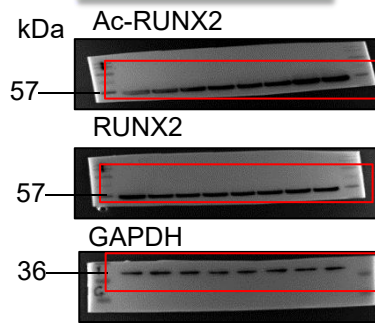

Repeation-3-4

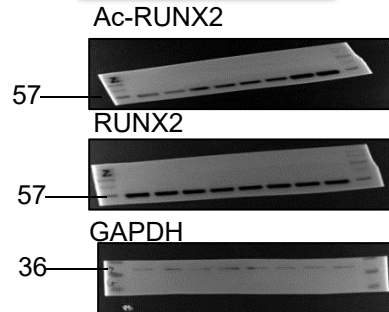

Figure S9E-Cytoplasm-RUNX2

Repeation-1-2

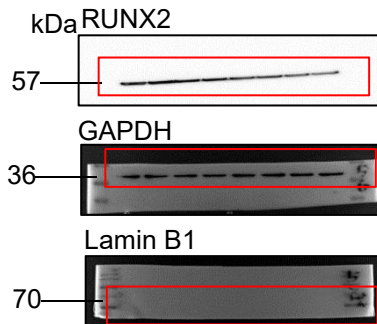

Repeation-3-4

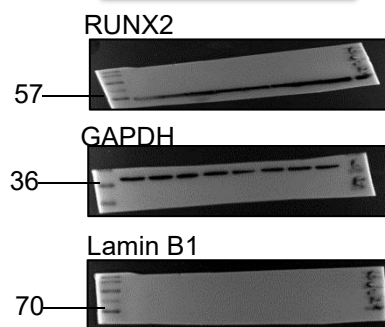

Figure S9E-Nuclear-RUNX2

Repeation-1-2

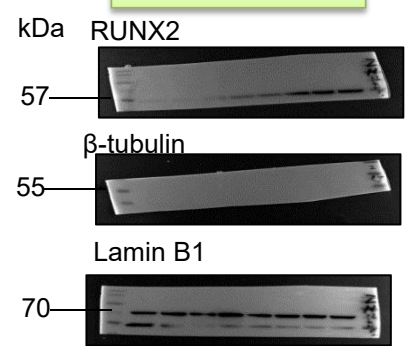

Repeation-3-4

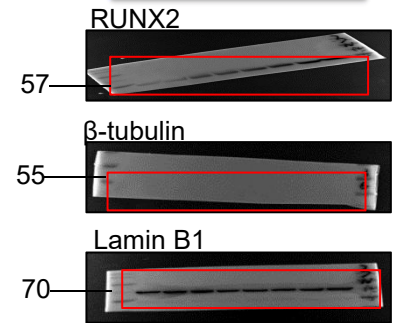

Figure S9G-P-HDAC4

Repeation-1-2

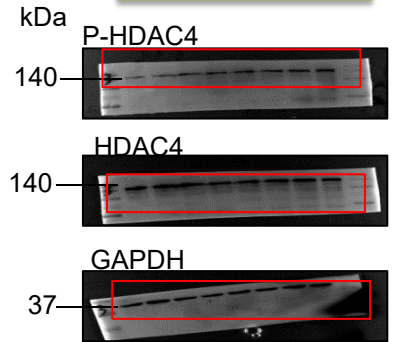

Repeation-3-4

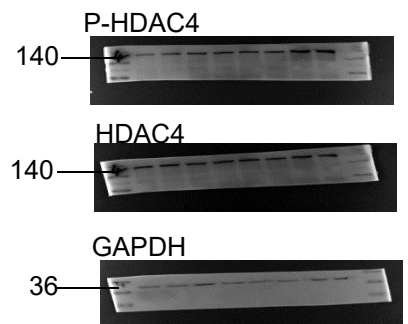

Figure S9H-  
Cytoplasm-HDAC4

Repeation-1-2

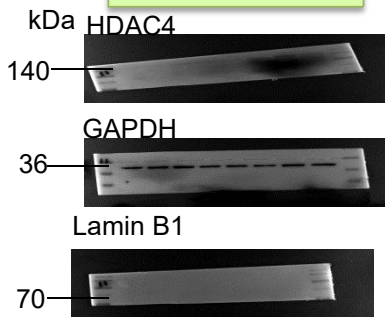

Repeation-3-4

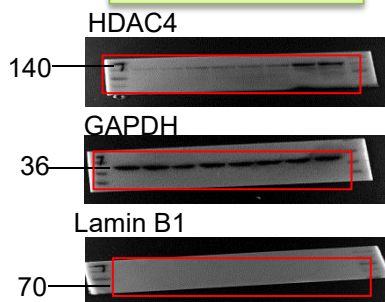

Figure S9H-  
Nuclear-HDAC4

Repeation-1-2

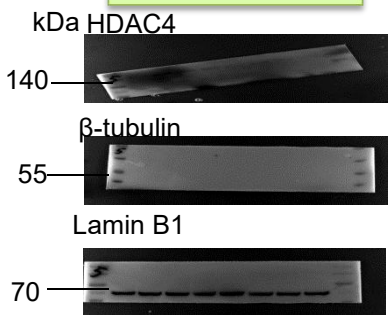

Repeation-3-4

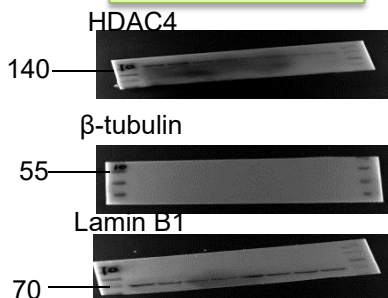

Figure S9J-IP

Repeation-1-3

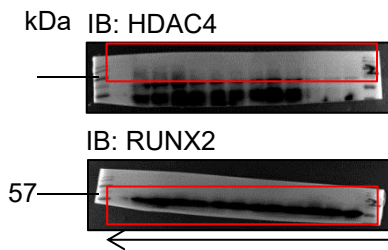

Figure S9J-Input

Repeation-1-3

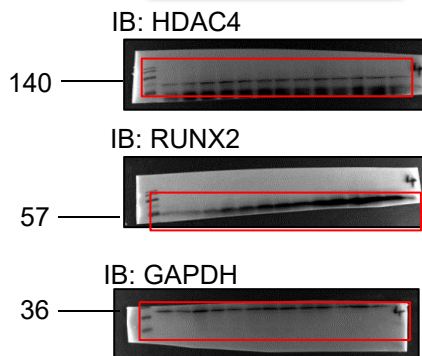

Figure S12D

Repeation-1-4

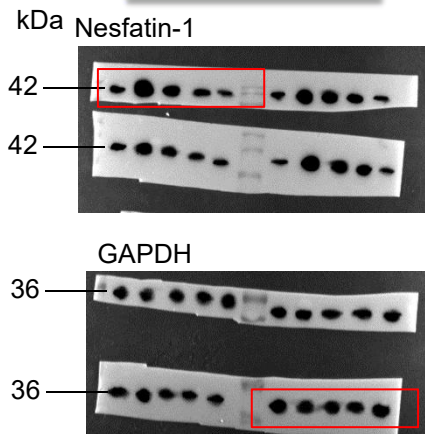

Figure S12E

Repeation-1-4

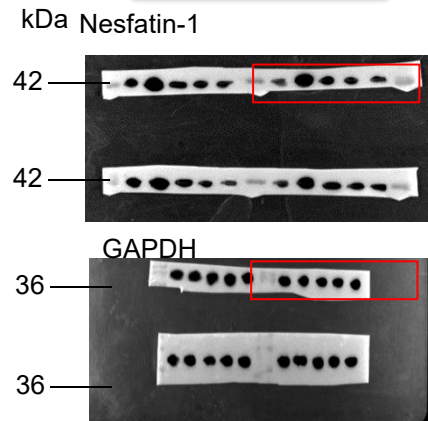

Figure S13A

Repeation-1-3

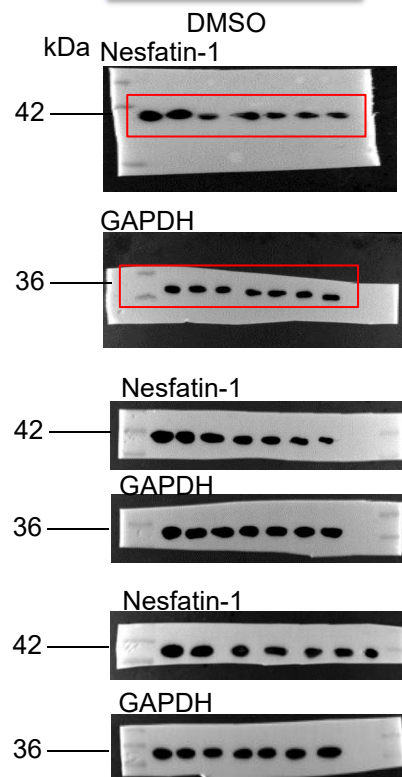

Figure S13A

Repeation-1-3

Curculigoside

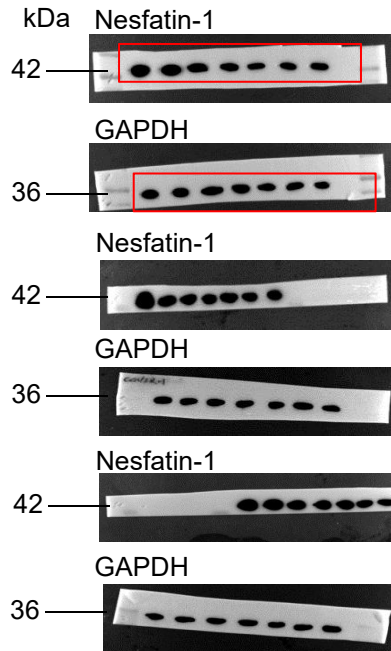

Figure S13B

Curculigoside

Repeation-1-3

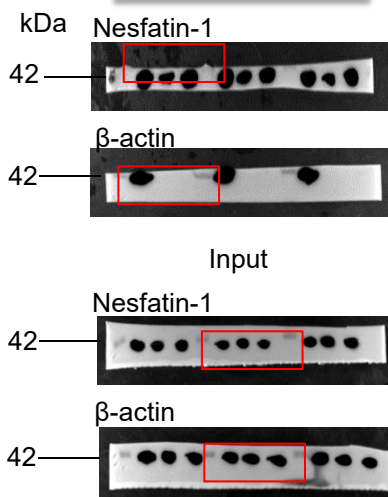

Figure S13C

Chebulagic acid

Repeation-1-3

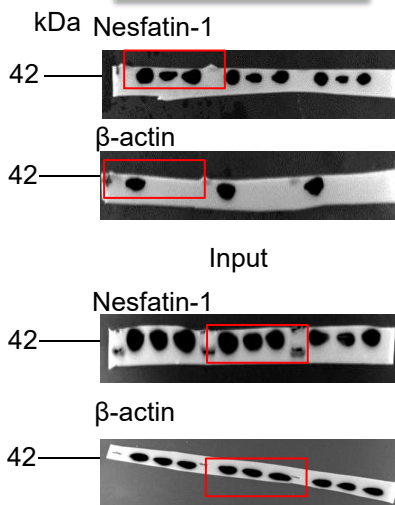

Figure S13A

Repeation-1-3

Chebulagic acid

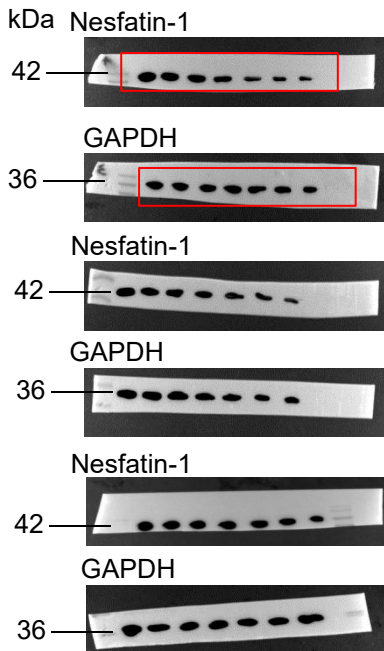

Figure S14D

Repeation-1-2

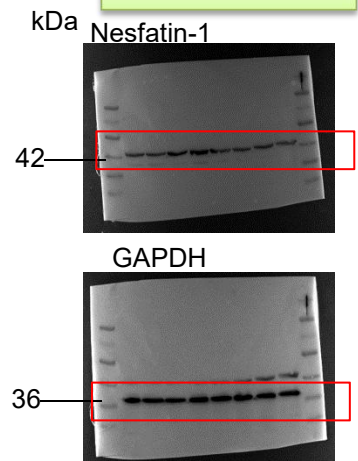

Repeation-3-4

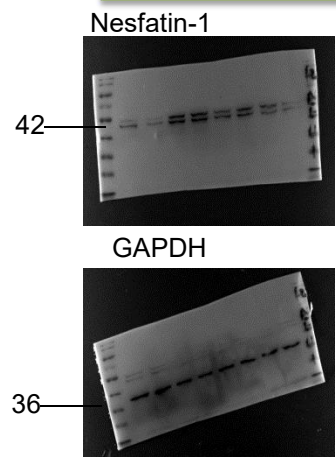

Figure S14D-RUNX2

Repeation-1-2

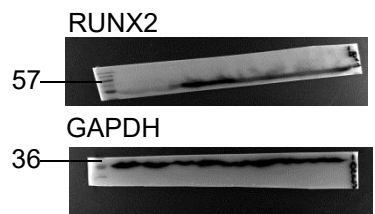

Repeation-3-4

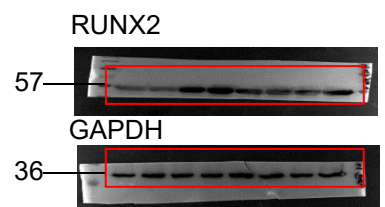

Figure S14D-RUNX2

Repeation-1-2

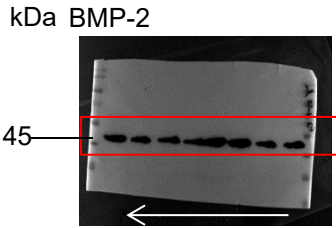

GAPDH

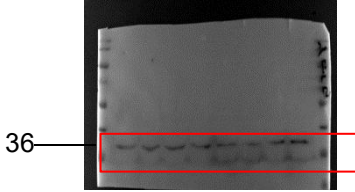

Repeation-3-4

BMP-2

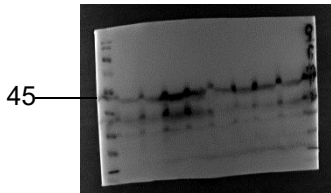

GAPDH

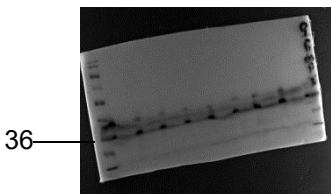

Figure S14D- $\alpha$ -SMA

Repeation-1-2

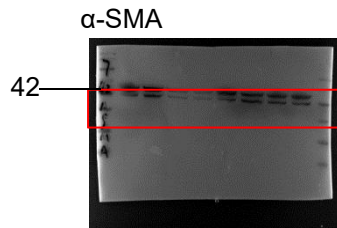

GAPDH

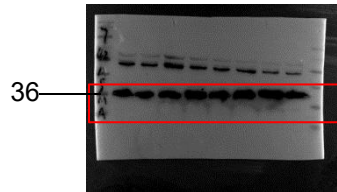

Figure S14D- $\alpha$ -SMA

Repeation-3-4

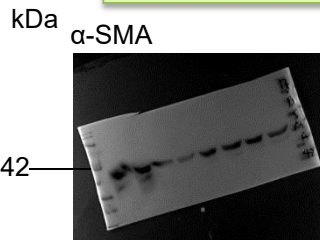

GAPDH

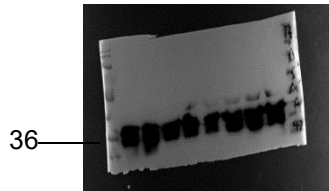

Figure S14D-SM22 $\alpha$

Repeation-1-2

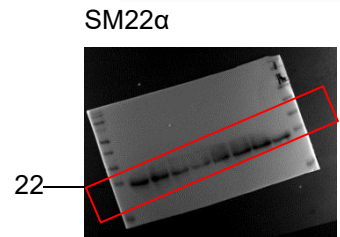

GAPDH

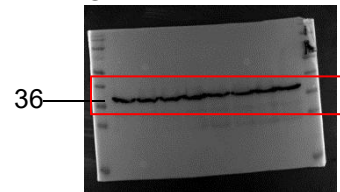

Repeation-3-4

SM22 $\alpha$

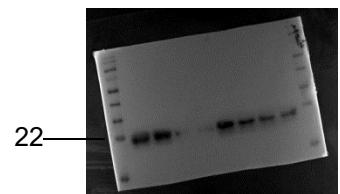

GAPDH

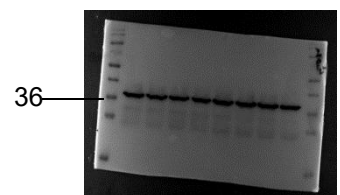

Supplement: 12964_2024_1873_MOESM1_ESM.pdf [file 12964_2024_1873_MOESM1_ESM.pdf]
